# Supplementary material
Source: publisher figshare collection journal article supplement (https://gsajournals.figshare.com/ndownloader/files/17726093)
Supplement: Supplementary file 1 [file 17726093]

## Sheet: Table S8
Table S8: P. oligandrum 27 putative Crinkler (CRN) effectors. For each protein the contig number (column A), gene ID, lenght and contig locus (column B, C, D). Signal peptide were annotated using SignalP-5.0 (column E). CRN domain are presented in column F. Protein sequence are provided in column G.
				SignalP-5.0 prediction results
Contig number	Gene ID	Gene length (in bp)	Locus	Prediction	CRN domain	Protein sequence
unitig_0	g588	1310	unitig_0:1567407-1568717	OTHER	LYLARK	MDEVELNCAVYGEGSVFPVKIARDAKVSALQEAIADIVSTEQHAVPPRLVTLYLARKKEGENDVWLKSDATFEGFLRRGRQKDEEYPYGKMIPNWILGEDYLGANFQPGRKEIHVLVDLPEGATGEKSETAQMVKEIHDQVVQTKRKRYVHSEMSSNKGNALLQDLNIRVKPARLVPFTTEDPTPAEAFTWESVCDEHDQLIVLAEEQQRERYRTYVEDNIGDVLAKKQLCVLGMEKGKNILSATVPGHNVELVGRTDMLILSDLAKQEPLHLEWLPEVKMLIEVKRNVKGGSVFQALSELIALDVLVDDPVMALLTDLTGHWQFFWVSEKSDNRVIIRTVIISDPSAAFAVIRTLLAQSPTGDADITLPCFEGPVKRRKLAQLLPSIGEGGESSGIRA…
unitig_2	g2030	1301	unitig_2:2375004-2376305	OTHER	LYLARK	MDEVEVELECAVYGEGSVFPVKIARDAKVSALQEAIAGVVSTEQHAVPPRLVTLYLARKNDTWLKDDRHVKNFLQAGKSAEYEEMRPSWILGEDYLGANFQPGRKEIHVLVELPEAAAGEKSVTAEMDKKLDKVLEHIMQPKRKRYVHSEMSSTKGNALLQDLNIRLKFVGTVPFTARYPAPVEGFKWESIDDGRGQNIALTEEQQRERYRTYVEDNIGDVLAEKKLCVLGVEKGKNILTATVPGHDIDLVGRTDILVLSALAKQFPHYVKGLPEVKMLIEVKRNVKGGSMFQALSELIALDILVADPVMALLTNLTDRWQFFWVSEKNNNYVNIQTTTITEPGAAFAVIRTLLAQSPNGDADITLPYFEGPVKRRKLAQLLPSIGEGGESSGIREAIE…
unitig_2	g2031	1292	unitig_2:2376962-2378254	OTHER	LYLARK	MDEVEVELECAVYGEGSVFPVKIARDAKVSALQEAIAGVVSTEQHAVPPRLVTLYLARKNDTWLKDDRHVKNFLQAGKSAEYEEMRPSWILGEDYLGANFQPGRKEIHVLVELPEAAAGEKSETAQMMKEIHEHVVRPKRKRYVHSEMSSTKGNALLQDLNIRVKPADSVPFTTEDPTPVEAFTWESVCNEHGQLIVLTEEQQRERYRTYVEDNIGDVLAEKKLCVLGVEKGKNILTATVPGHDIDLVGRTDMLVLSDVAKREPDHLEWLPEVKMLIEVKRNVKGGSMFQALSELIALDVLVDDPVMALLTDLTGRWQFFWVSEKSNNRVIIRTVIISNPSAAFAVIRTLLAQSPNGDADITLPYFEGPVKRRKLAQLLPSIGEGGESSGIREAIERYY…
unitig_2	g2033	1295	unitig_2:2380860-2382155	OTHER	LYLARK	MDEVEVELECAVYGEGSVFPVKIARDAKVSALQKAIFDDQRYHERFSFPPSALTLYLARKNDTWLKDDRHVKNFLQAGKSAEYEEMRPSWILGEDYLGANFQPGRKEIHVLVELPEAAAGEKSETAQMMKEIHEHVVRPKRKRYVHSEMSSTKGNALLQDLNIRVKPADSVPFTTEDPTPVEAFTWESVCNEHGQLIVLTEEQQRERYRRYVEDNIGDVLAEKKLCVLGVEKGKNILTATVPGHDIDLVGRTDMLVLSDVAKREPDHLEWLPEVKMLIEVKRNVKGGSMFQALSELIALDVLVDDPVMALLTDLTGRWQFFWVSEKSNNRVIIRTVIISNPSAAFAVIRTLLAQSPNGDADITLPYFEGPVKRRKLAQLLPSIGEGGESSGIREAIERY…
unitig_7	g4722	1383	unitig_7:1054696-1056079	OTHER	LYLARK	MVDVTIVCGVYGEGAVVPVTVSTDAKVSDLRDAIYYKKRYNKQYKFDSSALTLYLARKDQTTWMKDDQSVKSFLQGGVSTEYEEMRPTWKLSKAELFGSFELGDENIHVLVELPPNTVSRQQAGLWLVRGSILDALGTKGIRCRVYRLAGAYIGYYDPSRRISDNDSAIWYEDTTLHIHVLFESKGKAMGFDNALQDEPTTIGSPLRSHGVTTSVARVDAVSTDLRRVYYVHYNPQESESPQDTVSSISLTSEVTVVDASTDQFQYQRIEHERYFLPYGKAESCHLVSKKQTREHKREFGHYDRDMNNRLALSREMHGYYDALSYEVPIVNISPGSVVNHRTIGNRYKVEIFVEVLDGQCKDRVFSRLKDGSERTSDPLVWKTFVYVENPETFCFCLRW…
unitig_28	g6870	1304	unitig_28:1338543-1339847	OTHER	LYLARK	MDEVELNCAVYGEGSVFPVKIARDAKVSALQKAIFDDQRYHERFSFPPSAFTLYLARKKEGENDVWLADDDNLDALLGGDVDKQFVKMRSSWKLNKKELFGTSFTPGEEEIHVLVELPEAAAGEKSETAQMMKEIHEQVVQTKRKRYVHSEMSSNKGNALLQDLNIRVKPVGTVPFTARDPAPVQRFKWESVDDVRGQNIALTEEQQRERYREYVEYNIGDVLAEKKLCVLGVEKGKNILSVAVPGHEIDLVGRTDILVLSALAKQFPHYVELLPEVKMLIEVKKVVKAGSGFQALSELIALDLLVDDPVMALLTNLTDHWQFFWVSEKNNNHVIIQTTTVTEPGAAFAVIRTLLAQSPTGDADITLPCFEEPVKRRKLAQLLPSISEGGESSGIREAI…
unitig_450	g11677	1898	unitig_450:827857-829755	OTHER	LYLARK	MTTDVKLRCGVYGEGSVFSVEIQRNADVEALQKKIASTYRVVSNRVEVYPATLTLYLARKEGGPWLADDHHVKNFLQGGINTEYEEMRPSWHLDEDYFGADFQPGRKEIHVLVQVPEVLETAVANKKQRLEWRSTRWGSHAYDPNSQYFLLEKEDVDESGLPPVRLMLYCRPAFHRQFEFLRDEVLNEGHLGWILGPPGTGKSTTAMAFASTLDRSEWIVTWIHVGKFMSWRCVRLIGEDRRSRILDISDVDEVLMVEDTRHHVVLVDGWTAADEFIELTRKCVEWFLAGTKVKRRLAFVCSVAASGKFQEDMEILTRAREFRVWSWTLDEYLNAIKDDEVFQSVSQCLDAPAVLPDEEMSRAAMVESKYFYAGGSCRYMFHFRTATVATKLSDAVDSL…
unitig_73	g13507	1193	unitig_73:337788-338981	OTHER	LYLARK	MSSAAEAMELNCAVYGVGTIFSIKIAPDAKVSALQKAIYKDQRYKKRYSFPPSELTLYLARKGSVWLKGDACIPEILRGAVVDKEYKVMMPLLPLSAEQYFGAGFRPQSDDIHILVKLGSEGFFRQDRKVVVVDGVEVPITQDMDVNSTEIAAFWNALRACSTEIKPDAVIALPEGTYFLGEQKFGSRVYIRHCYPSLLKNCWELLHHVPSGAQVPSDVIILGNPGIGKTFFGGVILFHLARLGATVVYETAGTDKCYLFSSDTVITGLRRNFRHILRKQTTYYVVDAMKPEVNAAKTILLTSPRRSIWYEFNKANGTSRYMPVWSLDELMKCRDLVYPNIPVATVADCFRRWGGIARYVLRFAENSSQQAFLRQAINYVDLDKLVEACGKFEAKRG
unitig_9	g3603	374	unitig_9:66383-66757	OTHER	LYLAK	MMLKLPELQVLYNQRRADFDSRKVTMVKLFCALAGAGGSAFPVDIDPSQSVGDLKEAIQGKKPRKITCDADELELYLAKRGDAWLTENEVRGMSITNGLKYLGAARAELDAVGLSEKDLAIRHR
unitig_7	g4489	3214	unitig_7:464266-467480	OTHER	LYLAK	MDLSKILSAEDGDDDYQRHEELRYDRGVRRGYDHEDDDVEATHQPHMRPMPGGGDYALSRLDLLFQADAMIQQRKSPTPATASKEEYLRSGVWTRAEEEYAAALIFYFLRGSLPIAEGTTLRKYLAEQLCCNRRRVSMKLATETIADKKIPRKVGASVFVALKPAPTDDEYQSMVESLEQLRIECFREVEANKTPRSTFASSPDQLSPLVLAKERASSSPGMEELSLNASPAPKRKTRTVRRSAKDRRDSVSTPSSKKSPVQSKRRRPLIIRTGFDLEEEEEYALTLVEYFTEGTLDLPEQTSLVAYLCEQLQCSAKTLSMKLAPRKCGERKFPENIGSITFKRNMESDESGEVFEAEARAYELRQAWLQAKEEAAADEHDHFSTSAASSPVSTPVRSI…
unitig_507	g5683	2000	unitig_507:1643228-1645228	OTHER	LYLAK	MAPTQADARVRLADPLAELPIKNFKYVKNCTELYLAKRGITKIAHFEPFVNLEVLWINDNEIEQLDGLDTCFRIKQLYAQNNRIRSLDDSSLRHFKFLQELRLYDNKLRDFPSTLEALGRLHRLEDLDLFGNPIEEEENYRLHVIKAIPSLLVFDRHVITDEERAKAQRLRGDLLGEKRSKSRKKKSEVIAGAPPQTMSGTVKMLFREVKAIQRGREANAKAAAAQEVLEMSKTQQELSSLASHHQRKTKMANQENLGDLDEWELSALEKQFHQLETKKHTGLTRDQLPNLLRYLEDRGFSVICDGVSVVADRHDVLGNLLFGVNAASGQKIAWKDWKRILSSSHLRCEFMQPHILHATSSKHFETASTLQRRLLSISDESTRVKLSQELHILSQRAYH…
unitig_34	g8086	3234	unitig_34:364569-367803	OTHER	LYLAK	MNGTTSSYAPSRVRPFAARDEEDDDEVVDGFSGMRSSVNNWETIEREVEELLNPSEESRSRYSVDQDVEVGAFLSHQPQYQQSIVAKKLLLYEKQLIHRQKAIDKLERLQEHAQTTIQGLRRQLEQQEKDFEDERAEWEQEKTDMLRFRGAGGSGGGGGAAMQLQLRMGASAAALAARRRLTEADQLKQQQMRTQMLHGAAEAQAMLLDDAVDISFTNGPRRRTPWNYFRLWLMRRMSPLEKDVKQIEARFGTSVASYFRFFLWIISSFGAISIPALIFLILHILVLNEVAKVQAVEWTAFAGIAPKVFLLSGYVSFEALGYTVVLVSIMALLLLFTIRKWIAEDRLAKTVEAMENDRDEPKFSKVVLNAWDCSLTSHEQASDMKRAITEQIRLTVEEE…
unitig_56	g10733	2096	unitig_56:73449-75545	OTHER	LYLAK	MAGNEAELTCVNIRNGSDFTVDIPWTASIHKMKKLINAELQLTTLPSDLALYLAKPKDSDQWLSPRDPEVRNLRSNVVSDEIQKLLCDELAAGDLVANVVQHAPTSGVTMCLCFWKGYGGFPESYLVRKEEVIFWQVVKSMLKSIDDDNWPRIVLMKNRVAMSTWPKLVKEQHYYSGGSLREFCRERADLVAEVQANCSRVHSDHARDLVFAFGGDQSSRQMDRLRRHYVANPSDPSHYIRNGNWRVAVDSGYALHLLARFVTVAEQAGLYEYAQSVGGGFLGIAYELLLHRAVRQTVLPGSSVIVRMRPNSHYDRIHIDVSSVECRGENEDDCYECIAQLPEATYWHPNYPSFPFIDAVTPCKAYRPGSDESEDVIAYIQVTIQDNKTFKRHRLEQLN…
unitig_56	g10973	2387	unitig_56:724682-727069	OTHER	LYLAK	MMTTRLYIVCVNVRDGMDFGVRMAPDEYIGELKERINERQKYTQNADDLKLYLAKAKESDQWLAADDPAVTNLRHNVVSDEIQELLREDLKLQAGKRIDNLFQSAPNADVIHVLVVVPPPPASSPPATSLSAPVISFTITRGRATRDENDKDPWEAYTSIGKRLKDDKIVKDLAAQVERVAGMKKSTPFIVLENSSGTGKTQMAFNLEATELFEVFFIMCASSADRDQPIYEAFNQRSRSFEFCVDKDLPFVIKGSVQDLQGINHRLYLYGFIIAALNGDATFSERASRTDVELAIQRRQDRMAKPMVFFLDEFPRVGSGETNSIMDLRKARYRMMRNVFRSFSFPVVISSTNGTARNLFSIQGASRSVDPYLWCIVFPSLPHVSLDGDIKSVKCPDQV…
unitig_56	g10975	533	unitig_56:730942-731475	OTHER	LYLAK	MEKDITLGCVNVQDGKVFGVHMALDAYIFDLKKEINDKKMYTRDPDDLTLYLAKPKERSQWLAVGGPAVRNLRSNVVSDEIQQLLCDELLPTDTIEDIFKQAPTKGVVHVLVVPPEPPAPPVEDEFDLGVDSAHTAAWAPYVDAAKLLADDPQVLRLVDELKRVTTIEPTPFVVLEN
unitig_386	g11129	6884	unitig_386:206024-212908	OTHER	LYLAK	MGTPDTTRRERSDSHPQTFASVDEYVRELQGKRAIKSVLIANNGISAVKAIRSIRSWSYEMFADEHKVTFVVMATPEDLRANAEYIRMAEHVVEVPGGANNNNYANVSLIVEIAERYHVDAVWAGWGHASENPLLPDALLQTERKIVFIGPPSKPMRALGDKIGSTIIAQSANVPTIGWNGDGINVNYQEHGGIPDEIYNAAQLRDYEHCLAECKRIGFPVMIKASEGGGGKGIRKVLEESQVQSAWEAVRGEIPGSPIFVMKLAPKSRHLEVQLLADEYGNAIALSGRDCSVQRRHQKIVEEGPVLAPSSAVWDDMMRAATRLAKEVQYINAGTVEYLFSELPEDEGKAFFFLELNPRLQVEHPVTEMITNVNLPAAQLQVAMGIPLNFIPDIRRLYQ…
unitig_66	g12417	1079	unitig_66:380662-381741	OTHER	LYLAK	MNMEKVKLHCGVYGEGSVFSVEVERNADVEALQEAIFVKKRYKERYTFDASALTLYLAKKDGAWLKHDHTVKAFLQGDIDTEYEEMLSTWKLNKEELFGDFQLGGEEIHVLVELPERQSADPQLIELQESLLQHILMDAPTSTSVRSNHFKKKLCATYNCDMGSGQLRCMLLDTALPSELVIASHLFRRKNEFISEKFMGFSDIDDVRNGLLLFKPLEHALDHFQISFIYDPSSNEFRLKIFDRSMRKQRLLGKLDKTQRAILLQGQVLPKNWRSRGRRLAPGTNYDLQTTFGDLEGRTLCFRGIERPYKRCLNLQARLARKQAIKKQWIEPEEDDFQDFWSEGMSLAEKMEFYYTNET
unitig_68	g13266	569	unitig_68:343814-344383	OTHER	LYLAK	MFSGPDSSATMPTLWCGEYGKAIVFSVDIALSKTVENLLQAIYKRRRYGANNTFTADDLKLYLAKKNGVWLEESEDLITLLEGSVDTQFERLKTSVKVSRYFGGNLGNEGGSIHLLVELPPQPPPPPLPLAPLPPHITMPTLNPLANHEAYAAESVTLDEWNFDAVHNIPLISKFMAHLGNAQPMSSGG
unitig_73	g13418	1673	unitig_73:109910-111583	OTHER	LYLAK	MEANATATLSQNTTDTPQDLTSLLGSYRTGNVVIDTLLCLLVPILLQQLVSALQNGSEKSLFMMLWAYIWPKKEEEVVERMIEITQRFTRDGYKVWDYTQKNHLLQKAISLYLAKTLKLDTKDAKYELLDKPIQVAKPKDNDDGGSDTSNSSCYSSEDEDDDTYYGAVDQLRVESLPMVNQWIQVDKGVNFLHEIVTPQNPGDHKGVTETKVIFRFRSKLVDGTDRIDAFIEKAYAEYQMRERERVKEDKSRYFYIQSGTKESGSDSKTSTVAYKRYTLGEEKTFENLFFDEKANVMQLLDNFMKKSGKFAIKGFPYKLGFLLHGPPGTGKTSLIKAIAHHTKRHIVTINLGKIKSNQDLMDALFDLKFTVHGLDTAVTMSLEDVIFVMEDIDCASSIV…
unitig_73	g13504	1205	unitig_73:329063-330268	OTHER	LYLAK	MSSAAKPLELVCAVYGEQNAFHVKIAPDAEVSALQEVLAARLSTEAHKIDSRLVTLYLAKKENVWLKDDEEETEFLHGNVVDKQYKKMRSTWMLSDPKYFGVDFEPQPKDIHVLVKEESEVFFCQDRKAVVVDGVGIPITEGMKINPPELVAFWNALATCTTAIEVDALIKLAEGAYLLGDSSLGSSIYVRHCYPQLLDHCWKVIHDESTGIPHIVVLGNPGIGKTFFGYLILLHLARRGSTVVYETRARKRCYLFTSGKAFIGSQSDFEDILRKPTTYYIVDAVEPTYYPAKTILLTSPRRSVWYEFSKTKCRTCFMPVWSSAELMKCRDLVYRDVSDVTVADCFRRWGGIARYVLAYANFRDQQDMLEKAIAAVDLDVLVQACGEFEANDAQISHRL…
unitig_0	g702	707	unitig_0:1876041-1876748	OTHER	LYLAK	MSSRKDYSPRDLTYVIVGDGRIYGVDIHPQKRVRHLLGMIKEENKETIKCDAKDLTLYLAKKDNWLKTSDPDVKKLQQGDVPNGIVEIMKKAENEMTPAYRIGNTAFNFPDEDTAQEDEIHVLVVVPGQSIQRSSVQEPHSIRKRRWDEMNEILARNKKAKLGADGTTSTAFSYVSYNDLANLVRASSYEQPPKPIDDSYIDVLYEYLLIATKAFGEVVTGKEAKRLHFIAPVLA
unitig_2	g1468	1946	unitig_2:1074719-1076665	SP(Sec/SPI)	LYLAK	MKLFCALVGASGSAFPVDIDESLTVGDLKEVIRGKKPRKITCDADELELYLAKRGDAWLTENEVRGISDTNGLKYLGAARAELDVVGLSEEDLRFEIDKHRVAAGYGPVNVLVVVPSNGTSMSVVGTNIEKFRTPLQFSTAEHEGGVPSTFRTYRSATVHAFFRLLFPPGGNFLPLIFVRAPPLSGKSAMFDLLYNHIVLSQPDALVARVSANFMPESTTFCQYFSSTYGCDFKAFCKLDYEKVVLIDEAQVTYDDDLLWLGYLKNTLEGKVHGLRFVLFSSYGSFDIYREDVRPGTPILVPPGNTFGLNAAPSKPGLQLTRVELDEMIHGSIGAAVGDLIWILCSGHIGIARAILRFLHGKFGSKKASIAPEDLEAELRSVRLLRYIRDSYRGIPTLD…
unitig_2	g2029	1301	unitig_2:2373045-2374346	OTHER	LYLAK	MDEVEVELECAVYGEGSVFPVKIARDAKVSALQEAIAGVVSTEQHAVPPRLVTLYLAKKNGAWLADDDNLDALLGGDVDKQYMKMRPSWILGEDYLGANFQPGRKEIHVLVELPEAAAGEKSVTAEMDKKLDKVLEHIMQPKRKRYVHSEMSSTKGNALLQDLNIRLKFVGTVPFTARYPAPVEGFKWESIDDGRGQNIALTEEQQRERYRTYVEDNIGDVLAEKKLCVLGVEKGKNILTATVPGHDIDLVGRTDILVLSALAKQFPHYVKGLPEVKMLIEVKRNVKGGSMFQALSELIALDILVADPVMALLTNLTDRWQFFWVSEKNNNYVNIQTTTITEPGAAFAVIRTLLAQSPNGDADITLPYFEGPVKRRKLAQLLPSIGEGGESSGIREAIE…
unitig_2	g2032	1292	unitig_2:2378911-2380203	OTHER	LYLAK	MDEVEVELECAVYGEGSVFPVKIARDAKVSALQEAIAGVVSTEQHAVPPRLVTLYLAKKNGAWLADDDNLDALLGGDVDKQYMKMRPSWILSEDYLGVNFHPERKQIQVLVKLPEAAAGEKSETAQMMKEIHEHVVRPKRKRYVHSEMSSTKGNALLQDLNIRVKPADSVPFTTEDPTPVEAFTWESVCNEHGQLIVLTEEQQRERYRRYVEDNIGDVLAEKKLCVLGVEKGKNILTATVPGHDIDLVGRTDMLVLSDVAKREPDHLEWLPEVKMLIEVKRNVKGGSMFQALSELIALDVLVDDPVMALLTDLTGRWQFFWVSEKSNNRVIIRTVIISNPSAAFAVIRTLLAQSPNGDADITLPYFEGPVKRRKLAQLLPSIGEGGESSGIREAIERYY…
unitig_2	g2034	1295	unitig_2:2382811-2384106	OTHER	LYLAK	MDEVEVELECAVYGEGSVFPVKIARDAKVSALQKAIFDDQRYHERFSFPPSALTLYLAKKNGAWLADDDNLDALLGGDVDKQYMKMRPSWILSEDYLGVNFHPERKQIQVLVELPEAAAGEKSETAQMMKEIHEHVVRPKRKRYVHSEMSSTKGNALLQDLNIRVKPADSVSFTTEDPTPVEAFTWESVCNEHGQLIVLTEEQQRERYRRYVEDNIGDVLAEKKLCVLGVEKGKNILTATVPGHDIDLVGRTDMLVLSDVAKREPDHLEWLPEVKMLIEVKRNVKGGSMFQALSELIALDVLVDDPVMALLTDLTGRWQFFWVSEKSNNRVIIRTVIISNPSAAFAVIRTLLAQSPNGDADITLPYFEGPVKRRKLAQLLPSIGEGGESSGIREAIERY…
unitig_2	g2035	1304	unitig_2:2384763-2386067	OTHER	LYLAK	MDEVEVELECAVYGEGSVFPVKIARDAKVSALQKAIFDDQRYHERFSFPPSALTLYLAKKNGAWLADDDNLDALLGGDVDKQYMKMRPSWILGEDYLGANFQPGRKEIHVLVELPEAAAGEKSVTAEMDKKLDKVLEHIMQPKRKRYVHSEMSSTKGNALLQDLNIRLKFVGTVPFTARYPAPVEGFKWESIDDGRGQNIAFTEEQQRERYRTYVEDNIGDVLAEKKLCVLGVEKGKNILTATVPGHDIDLVGRTDILVLSALAKQFPHYVKGLPEVKMLIEVKRNVKGGSMFQALSELIALDILVADPVMALLTNLTDRWQFFWVSEKNNNYVNIQTTTITEPGAAFAVIRTLLAQSPNGDADITLPYFEGPVKRRKLAQLLPSIGEGGESSGIREAI…
unitig_2	g2036	1304	unitig_2:2386724-2388028	OTHER	LFLARK	MDEVEVELECAVYGEGSVFPVKIARDAKVSALQKAIFDDQRYHERFSFPPSALTLFLARKNDTWLKDDRHVKNFLQAGKSAEYEEMRPSWILGEDYLGANFQPGRKEIHVLVELPEAAAGEKSVTAEMDKKLDKVLEHIMQPKRKRYVHSEMSSTKGNALLQDLNIRLKFAGTVPFTARYPAPVEGFKWESIDDGRGQNIAFTEEQQRERYRTYVEDNIGDVLAEKKLCVLGVEKGKNILTATVPGHDIDLVGRTDILVLSALAKQFPHYVKGLPEVKMLIEVKRNVKGGSMFQALSELIALDILVADPVMALLTNLTDRWQFFWVSEKNNNYVNIQTTTITEPGAAFAVIRTLLAQSPNGDADITLPYFEGPVKRRKLAQLLPSIGEGGESSGIREAI…
